# Supplementary material for: Processed Animal Proteins from Insect and Poultry By-Products in a Fish Meal-Free Diet for Rainbow Trout: Impact on Intestinal Microbiota and Inflammatory Markers
Source: MDPI journal article supplement (doi:10.3390/ijms22115454), 2021-05-21
Supplement: s1 [file s1]

**[A]**

[illegible]

**[B]**

[illegible]
