# Supplementary material for: Processed Animal Proteins from Insect and Poultry By-Products in a Fish Meal-Free Diet for Rainbow Trout: Impact on Intestinal Microbiota and Inflammatory Markers
Source: MDPI journal article supplement (doi:10.3390/ijms22115454), 2021-05-21

**Figure S7.** Spearman’s correlation between gene expression of selected markers in midgut biopsies and dietary ingredients composition. A positive correlation is indicated by dark red, a negative correlation by dark blue. Stars indicate statistical significance after FDR correction (\*p < 0.05, \*\*p < 0.01, \*\*\*p < 0.001).

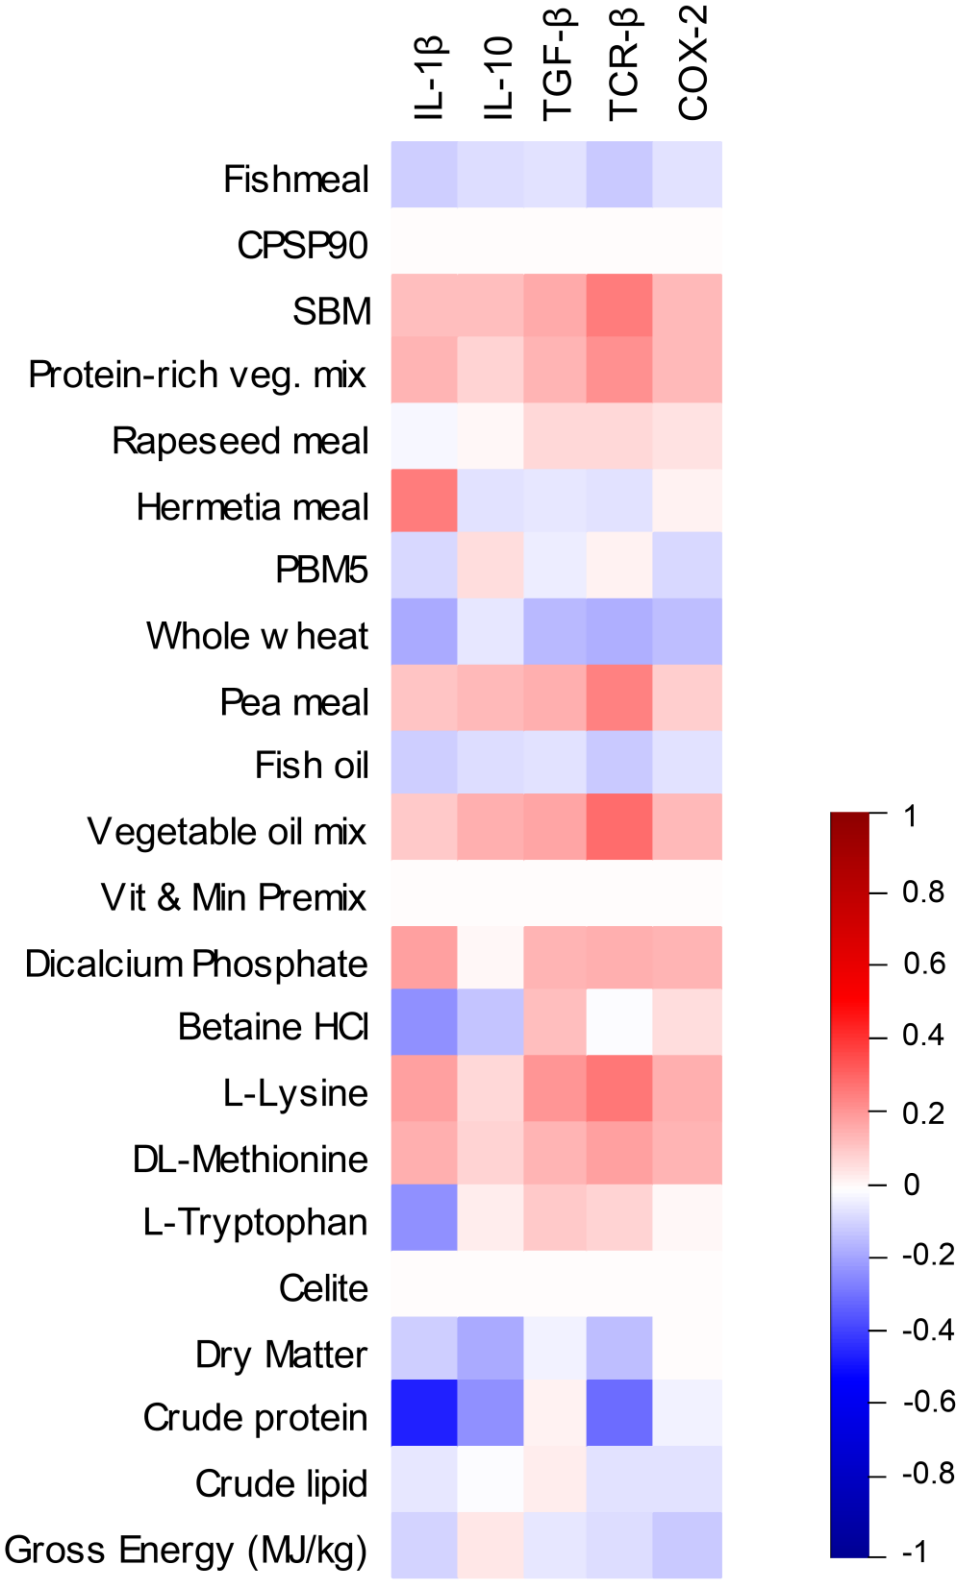

Supplement: s1 [file s1]
