# Supplementary material for: Processed Animal Proteins from Insect and Poultry By-Products in a Fish Meal-Free Diet for Rainbow Trout: Impact on Intestinal Microbiota and Inflammatory Markers
Source: MDPI journal article supplement (doi:10.3390/ijms22115454), 2021-05-21

**Figure S4.** Spearman's correlation between relative abundance of gut microbial genera and growth parameters. A positive correlation is indicated by dark red, a negative correlation by dark blue. Stars indicate statistical significance after FDR correction (\* $p < 0.05$ , \*\* $p < 0.01$ , \*\*\* $p < 0.001$ ). Families and genera were reported as "Unassigned" when they could not be assigned to any genus (g) or family (f) within the reference database (<http://greengenes.lbl.gov>), at a percent-age sequence homology of 95% or 90%, respectively for genus and family.

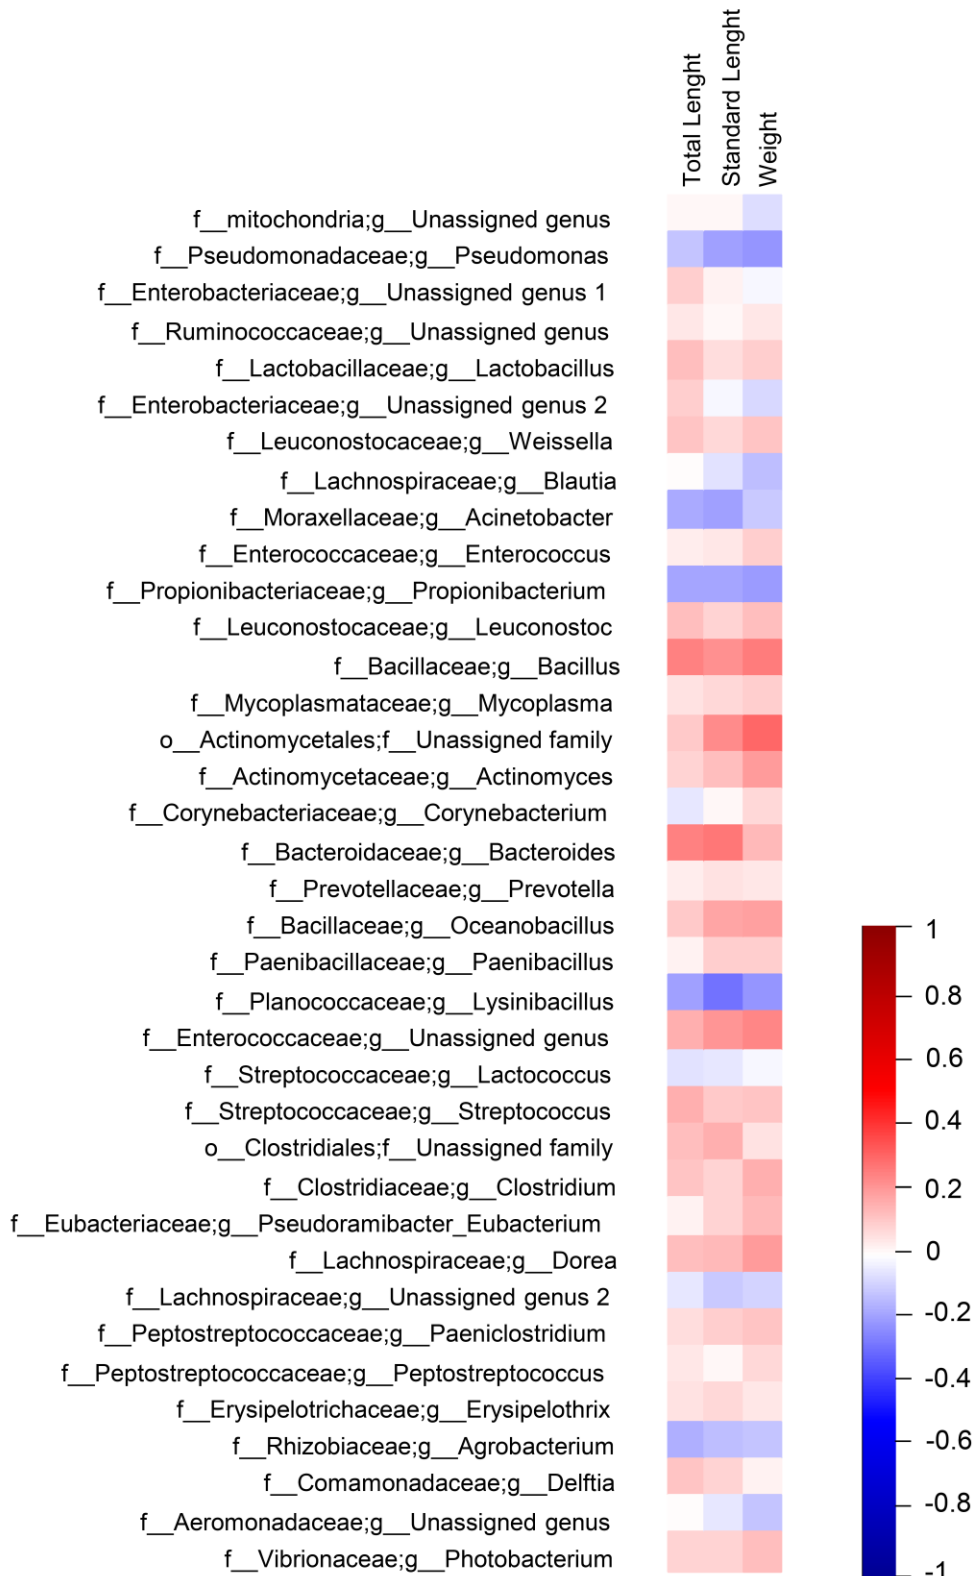

Supplement: s1 [file s1]
