# Supplementary material for: Processed Animal Proteins from Insect and Poultry By-Products in a Fish Meal-Free Diet for Rainbow Trout: Impact on Intestinal Microbiota and Inflammatory Markers
Source: MDPI journal article supplement (doi:10.3390/ijms22115454), 2021-05-21
Supplement: s1 [file s1]

### Experimental diets

| Ingredients (g/100g)               | CF   | CV   | H10  | H30  | H60  | P30  | P60  | H10P50 |
|------------------------------------|------|------|------|------|------|------|------|--------|
| Fishmeal <sup>1</sup>              | 47.5 | -    | -    | -    | -    | -    | -    | -      |
| CPSP90 <sup>2</sup>                | 5.0  | 5.0  | 5.0  | 5.0  | 5.0  | 5.0  | 5.0  | 5.0    |
| SBM                                | -    | 23.0 | 20.4 | 16.0 | 9.0  | 16.0 | 9.0  | 9.0    |
| Protein-rich veg. mix <sup>3</sup> | 3.8  | 34.9 | 30.4 | 21.9 | 10.2 | 21.2 | 8.0  | 8.3    |
| <i>Hermetia</i> meal <sup>4</sup>  | -    | -    | 7.8  | 22.7 | 45.0 | -    | -    | 7.8    |
| P <sup>5</sup>                     | -    | -    | -    | -    | -    | 17.8 | 36.0 | 29.7   |
| Whole wheat + Pea meal             | 22.6 | 7.1  | 9.2  | 9.6  | 9.2  | 16.8 | 21.6 | 18.0   |
| Fish oil                           | 15.1 | 4.4  | 4.4  | 4.4  | 4.4  | 4.4  | 4.4  | 4.4    |
| Vegetable oil mix <sup>6</sup>     | 4.3  | 17.7 | 16.7 | 14.8 | 12.0 | 15.5 | 13.4 | 13.2   |
| Vit & Min Premix                   | 1.7  | 1.7  | 1.7  | 1.7  | 1.7  | 1.7  | 1.7  | 1.7    |
| Dicalcium Phosphate                | -    | 3.0  | 3.0  | 2.8  | 2.7  | 0.6  | -    | 1.8    |
| Betaine HCl                        | -    | 1.5  | -    | -    | -    | -    | -    | -      |
| L-Lysine                           | -    | 1.2  | 0.9  | 0.7  | 0.5  | 0.6  | 0.6  | 0.8    |
| DL-Methionine                      | -    | 0.45 | 0.45 | 0.40 | 0.35 | 0.35 | 0.25 | 0.25   |
| L-Tryptophan                       | -    | 0.05 | 0.02 | -    | -    | 0.04 | 0.05 | 0.03   |
| <b>Proximate composition</b>       |      |      |      |      |      |      |      |        |
| Dry Matter                         | 92.4 | 91.2 | 90.5 | 91.2 | 91.1 | 90.7 | 94.0 | 92.9   |
| Crude protein                      | 42.0 | 42.1 | 41.9 | 41.5 | 42.0 | 41.8 | 42.2 | 41.9   |
| Crude lipids                       | 23.9 | 23.9 | 24.2 | 23.8 | 24.1 | 23.9 | 24.0 | 24.2   |
| Ash                                | 9.5  | 8.0  | 8.2  | 8.3  | 8.6  | 6.7  | 6.8  | 8.4    |
| Chitin#                            | -    | -    | 0.37 | 1.1  | 2.1  | -    | -    | 0.37   |
| Gross Energy (MJ/kg)               | 22.4 | 21.9 | 22.5 | 21.9 | 22.5 | 22.5 | 22.9 | 22.9   |
