# Supplementary material for: Processed Animal Proteins from Insect and Poultry By-Products in a Fish Meal-Free Diet for Rainbow Trout: Impact on Intestinal Microbiota and Inflammatory Markers
Source: Int J Mol Sci. 2021 May 21;22(11):5454. doi: 10.3390/ijms22115454 (PMC8196822; doi:10.3390/ijms22115454)
Supplement: Supplementary file 1 [file ijms-22-05454-s001.zip]

Archive with 10 entries (10 files):
- Figure S7_revision.pdf
- Figure S8_revision.pdf
- Table S1.pdf
- Table S2.pdf
- Figure S1_revision.pdf
- Figure S2_revision.pdf
- Figure S3_revision.pdf
- Figure S4_revision.pdf
- Figure S5_revision.pdf
- Figure S6_revision.pdf
